# Supplementary material for: NiFe2O4@ nitrogen-doped carbon hollow spheres with highly efficient and recyclable adsorption of tetracycline
Source: Royal Society of Chemistry journal article supplement (doi:10.1039/c9ra00670b), 2019-01-01
Supplement: c9ra00670b1.pdf [file c9ra00670b1.pdf]

## Supporting Information for

### **NiFe<sub>2</sub>O<sub>4</sub>@ Nitrogen-Doped Carbon Hollow Spheres with highly efficient and recyclable adsorption of tetracycline hydrochloride**

Zhe chen<sup>a</sup>, Dongzhao mu<sup>a</sup>, Feng chen<sup>b</sup>, and Naidi tan<sup>a\*</sup>

<sup>a</sup> *School of Material Science and Technology, Jilin Institute of Chemical Technology,*

*Jilin, 132022, PR China,*

*E-mail: [chenzhecz999@163.com](mailto:chenzhecz999@163.com)*

<sup>b</sup> *Jinlin Petrochemical Company Organic Synthetic Plants, Jinlin, 132021, P. R.*

*China*

## 1. Characterizations

A D/Max-RB X-ray diffractometer (Rigaku, Japan) was used to obtain X-ray diffraction (XRD) patterns. TEM images were obtained on a transmission electron microscope (JEM-2100F, JEOL, Japan) with an accelerating voltage of 200 kV. FESEM images were recorded on a field emission scanning electron microscope (JSM-7500, JEOL, Japan) with an accelerating voltage of 15 kV. Chemical states of elements were measured on an X-ray photoelectron spectroscopy (XPS) equipped with an ultra-high vacuum VG ESCALAB 210 electron spectrometer. Fourier transform infrared spectra (FTIR) were measured on an IR Affinity-1 FTIR spectrometer (Shimadzu, Japan). N<sub>2</sub> adsorption-desorption isotherms were measured on a Micromeritics ASAP 3020 equipment (USA). All as-synthesized samples were degassed at 180 °C for 5 h prior to adsorption measurements. Specific surface area was determined by the multipoint Brunauer–Emmett–Teller (BET) method. The magnetization curve was conducted on Quantum Design MPMS-7 SQUID magnetometer at 300 K under varying magnetic field.

## 2. Adsorption experiment

**Table 1.** The corresponding physicochemical properties of prepared samples.

| Sample                                         | Average crystal size [nm]<br>(standard deviation) | S <sub>BET</sub><br>[m <sup>2</sup> g <sup>-1</sup> ] | Pore volume<br>[cm <sup>3</sup> g <sup>-1</sup> ] |
|------------------------------------------------|---------------------------------------------------|-------------------------------------------------------|---------------------------------------------------|
| NiFe <sub>2</sub> O <sub>4</sub>               | 6.46                                              | 21.85                                                 | 0.04                                              |
| NiFe <sub>2</sub> O <sub>4</sub> /NCHS(before) | 5.34                                              | 335.9                                                 | 0.68                                              |
| NiFe <sub>2</sub> O <sub>4</sub> /NCHS(after)  | 3.38                                              | 268.8                                                 | 0.22                                              |

**Table 2.** Pseudo-first-order and pseudo-second-order kinetic parameters of the as-prepared samples.

| Samples    | $q_{e,exp}$<br>( $mg \cdot g^{-1}$ ) | Pseudo-first-order model             |                                     |       | Pseudo-second-order model         |                                                           |       |
|------------|--------------------------------------|--------------------------------------|-------------------------------------|-------|-----------------------------------|-----------------------------------------------------------|-------|
|            |                                      | $q_{e,cal}$<br>( $mg \cdot g^{-1}$ ) | $k_1$ ( $\times 10^{-2} min^{-1}$ ) | $R^2$ | $q_{e,cal}$ ( $mg \cdot g^{-1}$ ) | $K_2$ ( $\times 10^{-2} g \cdot mg^{-1} \cdot min^{-1}$ ) | $R^2$ |
| NiFe       | 29.11                                | 29.33                                | 13.68                               | 0.890 | 29.96                             | 1.60                                                      | 0.989 |
| NiFe- NCHS | 41.28                                | 27.45                                | 3.39                                | 0.891 | 41.84                             | 3.44                                                      | 0.999 |

**Table 3.** Parameters of Langmuir isotherm and Freundlich isotherm for TC adsorption on  $NiFe_2O_4/NCHS$ .

| Samples    | Langmuir model                  |                             |       | Freundlich model            |       |       |
|------------|---------------------------------|-----------------------------|-------|-----------------------------|-------|-------|
|            | $q_{max}$ ( $mg \cdot g^{-1}$ ) | $K_L$ ( $L \cdot mg^{-1}$ ) | $R^2$ | $K_F$ ( $mg/g)(L/mg)^{1/n}$ | $n$   | $R^2$ |
| NiFe- NCHS | 271.739                         | 0.048                       | 0.996 | 32.478                      | 2.258 | 0.960 |

**Table 4.** The maximum adsorption capacity for TC by different adsorbents for comparison

| Samples                                    | $q_{max}$ ( $mg/g$ ) | References |
|--------------------------------------------|----------------------|------------|
| Mag@ZnO- $Co_3O_4$                         | 128                  | 1          |
| graphene oxide                             | 212                  | 2          |
| GO-MPs                                     | 39.1                 | 3          |
| Ni nanoparticles/silica (Ni NPs/ $SiO_2$ ) | 381.3                | 4          |
| MWCNT                                      | 269.54               | 5          |
| activated sludge                           | 91                   | 6          |
| NHCS-NiFe                                  | 271.739              | This work  |

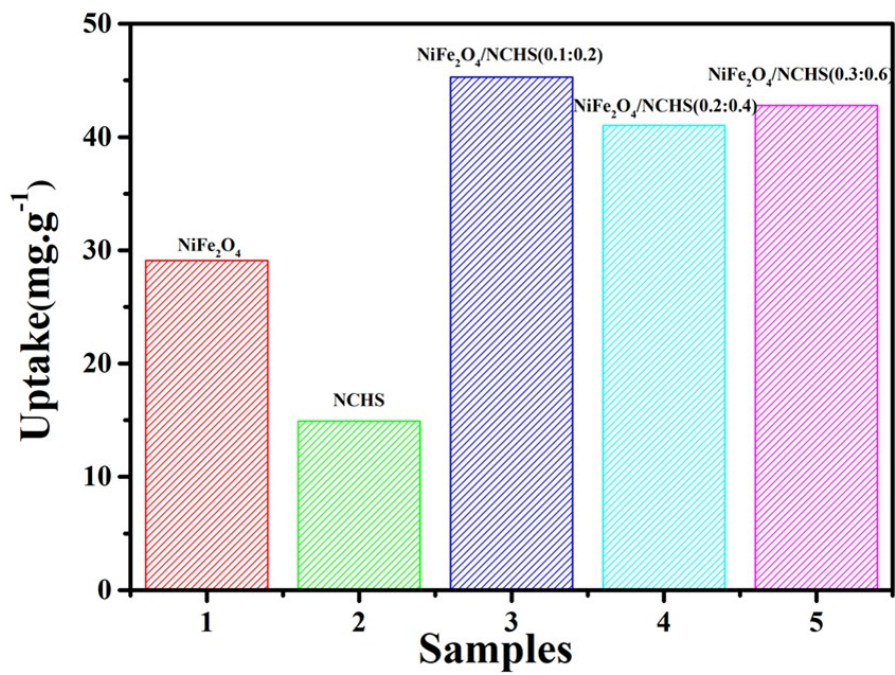

**Figure S1.** Adsorption of TC by magnetic composites with different concentration of raw materials.

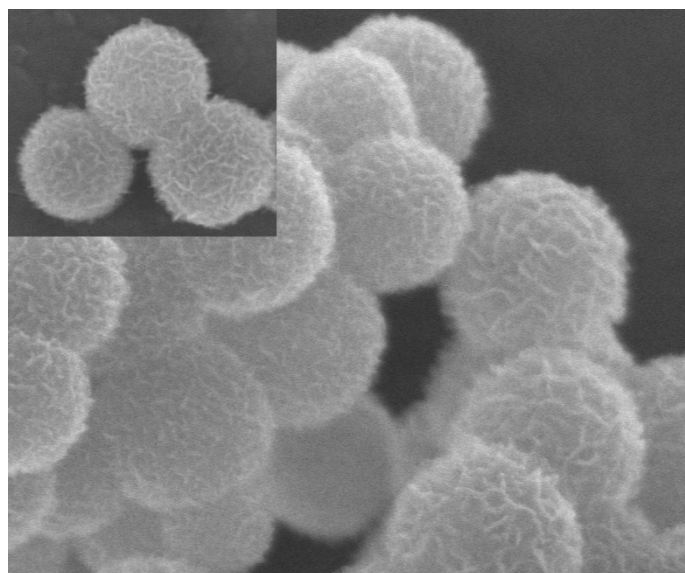

**Figure S2.** The SEM images of NiFe<sub>2</sub>O<sub>4</sub>/C samples after absorption.

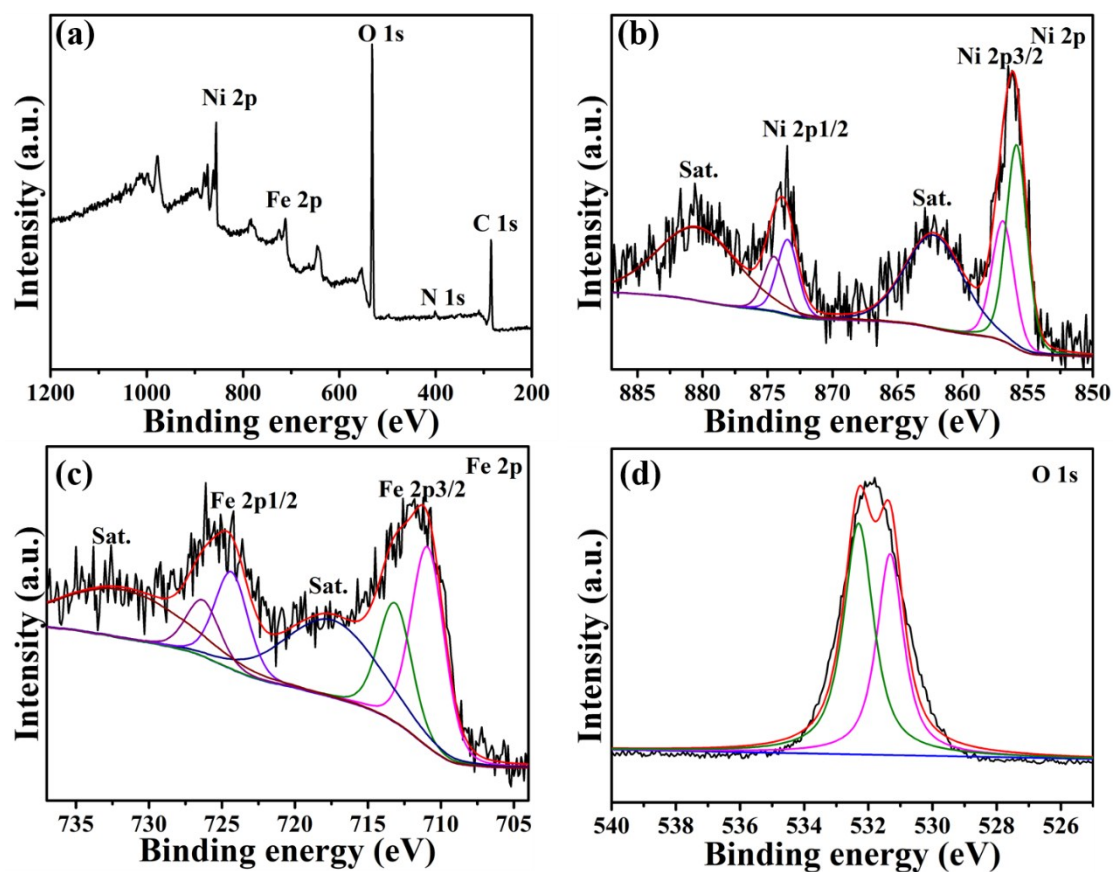

**Figure S3.** X-ray photoelectron spectroscopy (XPS) spectra of (a) the survey spectrum, (b) Ni 2p, (c) Fe 2p, (d) O 1s for NiFe<sub>2</sub>O<sub>4</sub>/NCHS composite after adsorption.

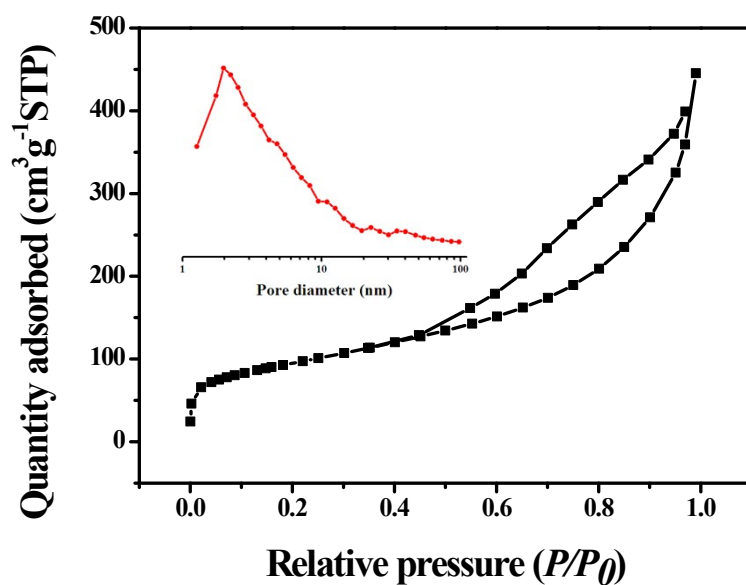

**Figure S4.** N<sub>2</sub> adsorption/desorption isotherm and the corresponding pore size distribution (inset) of the adsorbed NiFe<sub>2</sub>O<sub>4</sub>/NCHS composite.

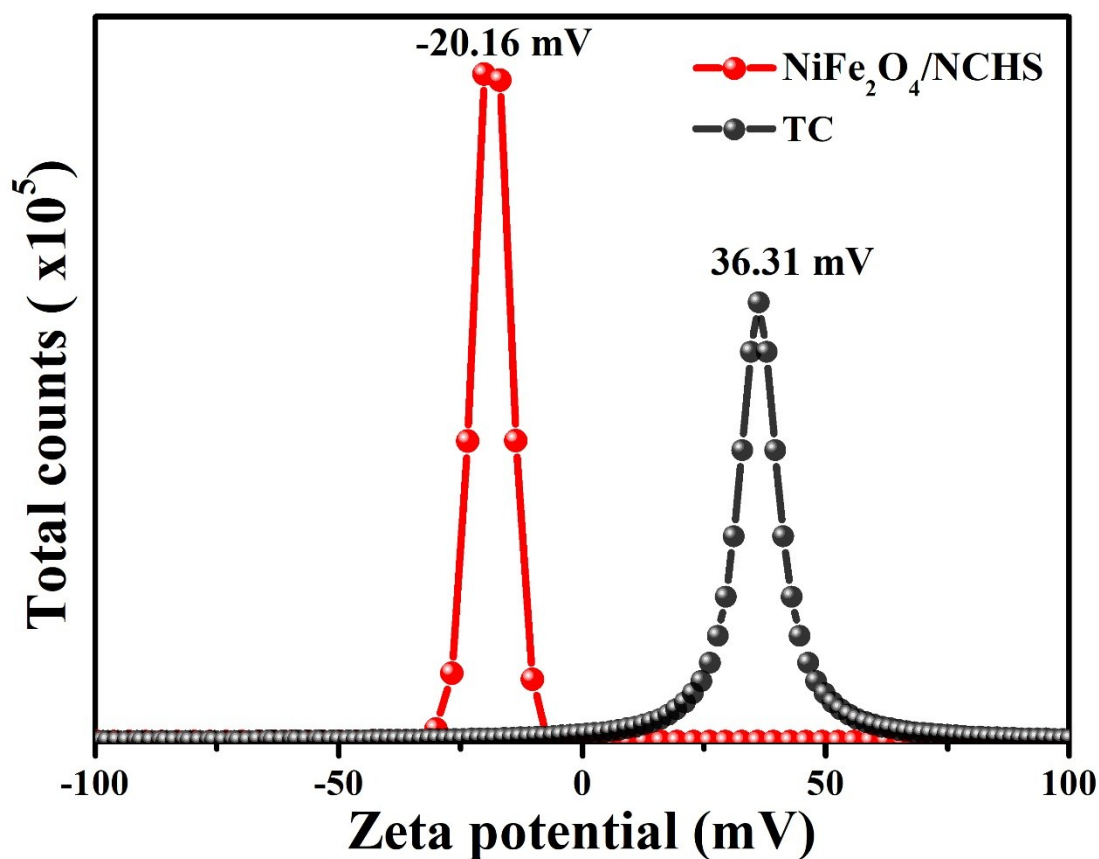

Figure S5.  $\zeta$  potentials of samples (pH 7)

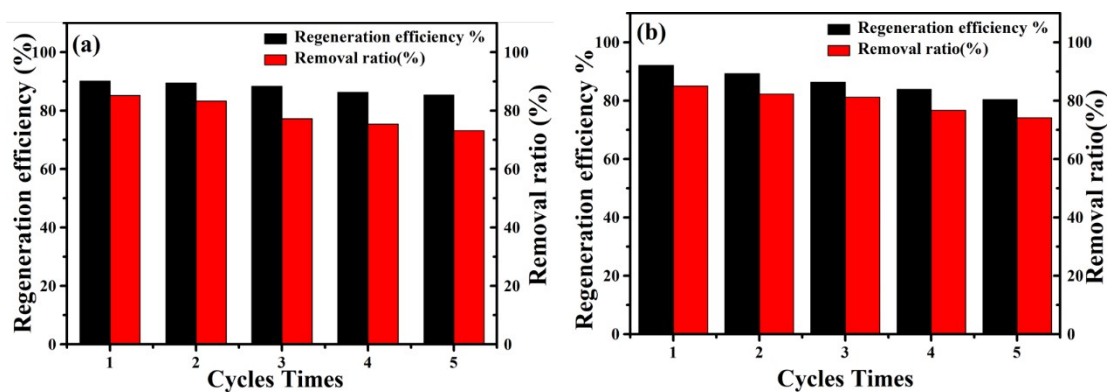

Figure S6. (a) Regeneration efficiency of NaOH (0.001 M) for NiFe<sub>2</sub>O<sub>4</sub>/NCHS with tetracycline (b) Regeneration efficiency of NH<sub>3</sub>·H<sub>2</sub>O (0.001 M) for NiFe<sub>2</sub>O<sub>4</sub>/NCHS with tetracycline (initial tetracycline concentration: 20 mg·L<sup>-1</sup>, pH: 5, adsorbent dosage: 0.05 g, temperature: 298 K).

## ■ REFERENCES

- (1) L.L. Lian, J.Y. Lv, D.W. Lou, *ACS Sustainable Chem. Eng.* 2017,**5**,10298-10306.
- (2) Y. Gao, Y. Li, L. Zhang, H. Huang, J. Hu, S.M. Shah, X. Su, *J. Colloid Interface Sci.* 2012, **368**,540-546.
- (3) Y.X. Lin, S. Xu, L. Jia, *Chem. Eng. J.* 2013,**225**,679–685.
- (4) S.W. Zhang, H.H. Gao, J.X. Li, Y.S. Huang, A. Alsaedi, T. Hayat, X.J. Xu, X.K. Wang, *J. Hazard.Mater.* 2017,**321**,92–102.
- (5) L. Zhang, X.Y. Song, X.Y. Liu, L.J. Yang, F. Pan,J.N. Lv, *Chem.l Eng. J.* 2011,**178**,26-33.
- (6) X. Song, D. Liu, G. Zhang, M. Frigon, X. Meng, K. Li, *Bioresour. Technol.* 2014, **151**,428–431.
